# Supplementary material for: Suppression of NASH-Related HCC by Farnesyltransferase Inhibitor Through Inhibition of Inflammation and Hypoxia-Inducible Factor-1α Expression
Source: Preprints.org preprint supplement (doi:10.20944/preprints202306.0548.v1), 2023-06-07
Supplement: Supplementary file 1 [file supplementary]

## Supplementary Material

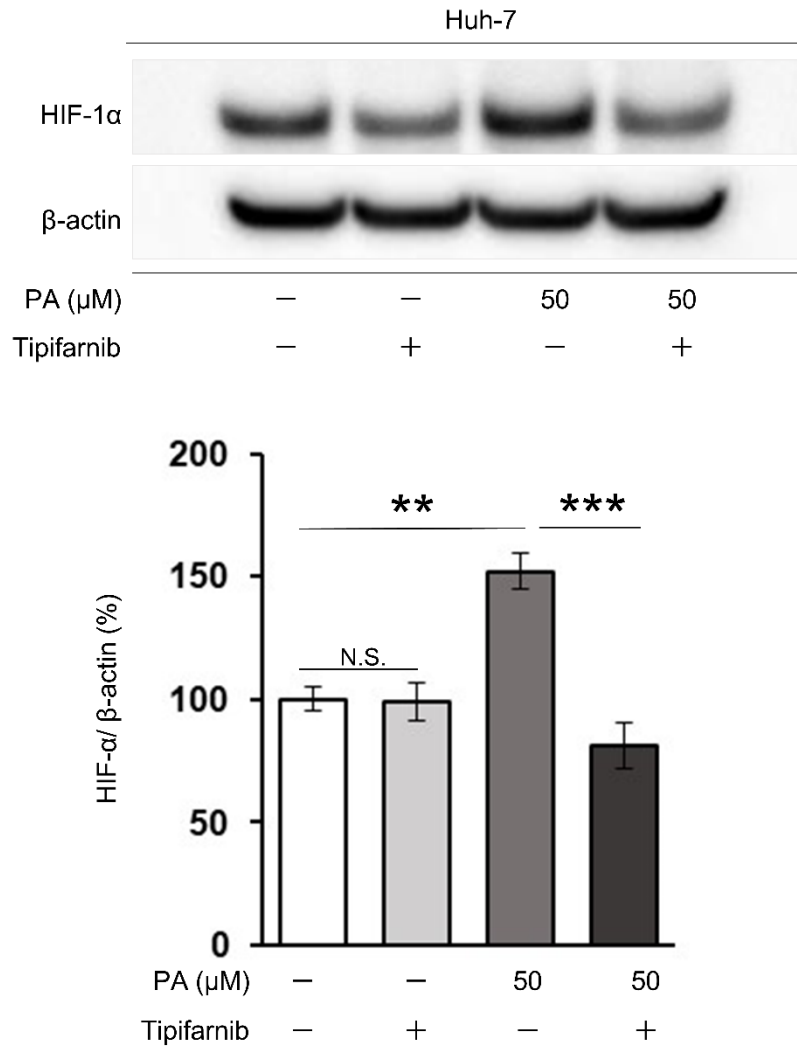

**Figure S1.** Effect of tipifarnib on HIF-1 $\alpha$  expression in Huh-7 cells treated with 50  $\mu\text{M}$  PA as the fatty acid-loaded condition. HIF-1 $\alpha$  expression was increased by 50  $\mu\text{M}$  PA treatment for 24 h similarly to 25  $\mu\text{M}$  PA. Treatment with tipifarnib (300 nM) for 24 h reversed the increase in HIF-1 $\alpha$  expression by PA treatment. \*\* $p < 0.01$ , \*\*\* $p < 0.001$ , N.S.: not significant.

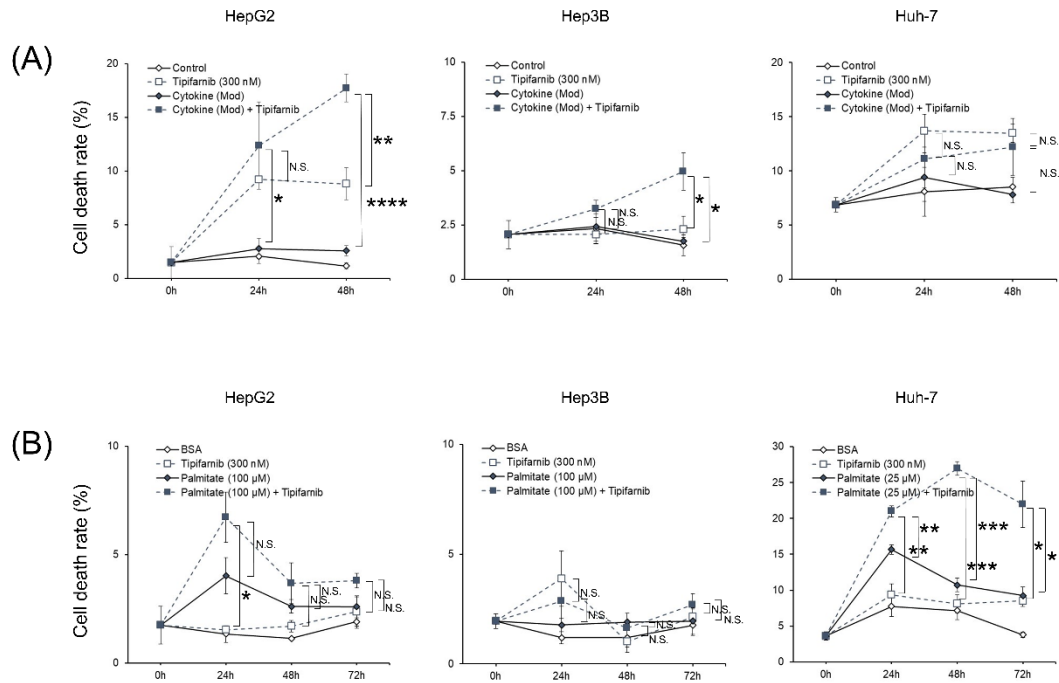

**Figure S2.** (A, B) Cell death was assessed under the inflammation-induced condition (moderate concentrations of the cytokine cocktail) for 0–48 h (A) and fatty acid-loaded condition (followed by the amount of PA) (HepG2 and Hep3B cells: 100 μM; Huh-7 cells: 25 μM) for 0–72 h (B) with or without 300 nM tipifarnib. Tipifarnib alone versus cytokine cocktail/PA with tipifarnib, cytokine cocktail/PA without tipifarnib versus conditions with tipifarnib. \* $p < 0.05$ , \*\* $p < 0.01$ , \*\*\* $p < 0.001$ , \*\*\*\* $p < 0.0001$ , N.S.: not significant.
